# Supplementary material for: Structural insights into the Cdt1-mediated MCM2–7 chromatin loading
Source: PubMed Central journal article supplement — Nucleic Acids Res. 2011 Dec 2;40(7):3208–17. doi: 10.1093/nar/gkr1118 (PMC3326298; doi:10.1093/nar/gkr1118), 2011-12-02
Supplement: supp_gkr1118_nar-02073-m-2011-File008.pdf [file supp_gkr1118_nar-02073-m-2011-File008.pdf]

## **SUPPLEMENTARY TABLES, FIGURES FOR:**

### **Structural Insights into the Cdt1-Mediated Mcm2-7 Chromatin Loading**

Changdong Liu<sup>\*</sup>, Rentian Wu<sup>\*</sup>, Zhun Wei<sup>\*</sup>, Bo Zhou, Jiafeng Wang, Bik K. Tye<sup>†</sup>, Chun Liang<sup>‡</sup> and Guang Zhu<sup>‡</sup>

Division of Life Science and State Key Laboratory of Molecular Neuroscience, The Hong Kong University of Science and Technology, Clear Water Bay, Kowloon, Hong Kong, China. <sup>†</sup>Department of Molecular Biology & Genetics, Cornell University, USA

<sup>\*</sup>:These authors contributed equally to the work.

<sup>‡</sup>: Corresponding authors

Chun Liang: bccliang@ust.hk; Fax: 852-2358-1552

Guang Zhu: gzhu@ust.hk; Fax: 852-2358-1552

**Figure S1** Validation of hCBD structure with  $^1\text{H}$ - $^{15}\text{N}$  residual dipolar couplings (RDCs). To validate the three-dimensional structural fold of hCBD in solution, fifty-two experimental  $^1\text{H}$ - $^{15}\text{N}$  RDCs with hCBD protein weakly aligned in Pf1 were measured for the well-resolved resonances. These RDCs from backbone of hCBD agree well with the values back-calculated from the structure determined based on the NOEs and dihedral angle constraints, with the Q factor being 0.32(44).

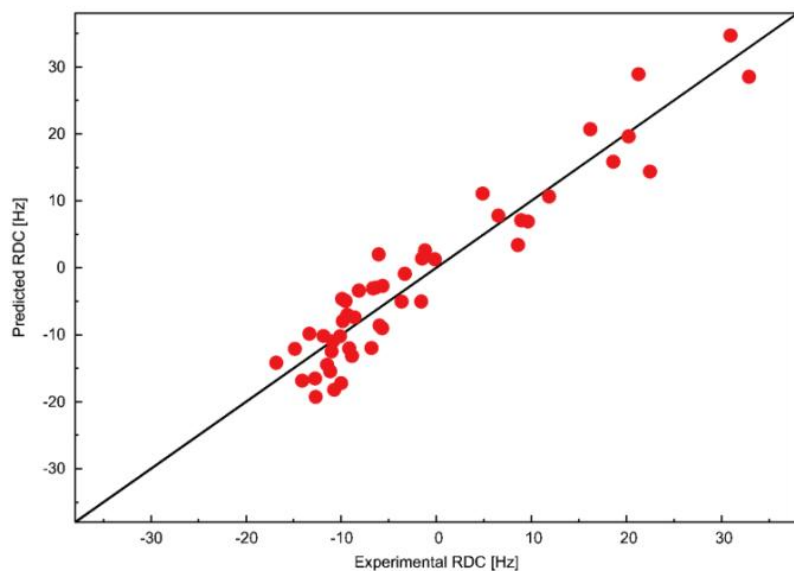

**Figure S2** The effect of mutations in hCBD and hMBD. (A) Similar amounts of human GST-hCBD mutant proteins (upper panel) were used in the GST pull-down assay. The immunoblot with anti-His antibody shows the binding of human GB1-His-hMBD to the wild-type or mutant hCBD (lower panel). Mutants highlighted in red exhibited a significant reduction in binding to hMBD(23). (B) The upper panel shows the relatively equal amounts of GST-CBD used in the GST pull-down assay. The immunoblot with anti-His antibodies shows the binding of GST-CBD to the wild-type (WT) and mutants of GB1-his-MBD (lower panel). (C) SDS-PAGE of the WT and mutants of GB1-his-MBD after Ni-NTA column chromatography. The WT and mutants of GB1-his-MBD are purified to homogeneity by Ni-NTA affinity chromatography.

(A)

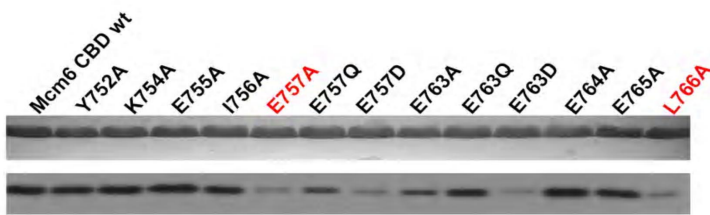

(B)

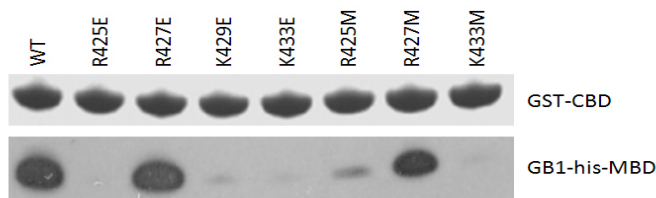

(C)

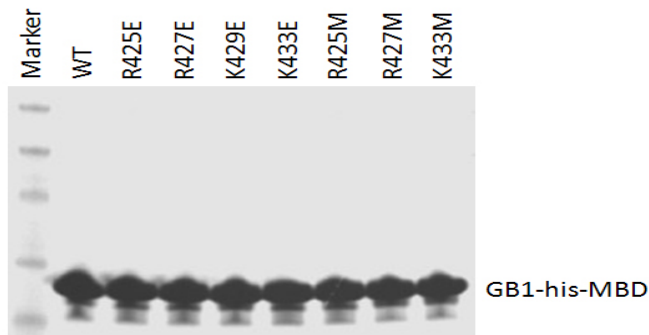

**Figure S3** Alignment of the C-terminal regions of human MCM2-MCM7 sequences.

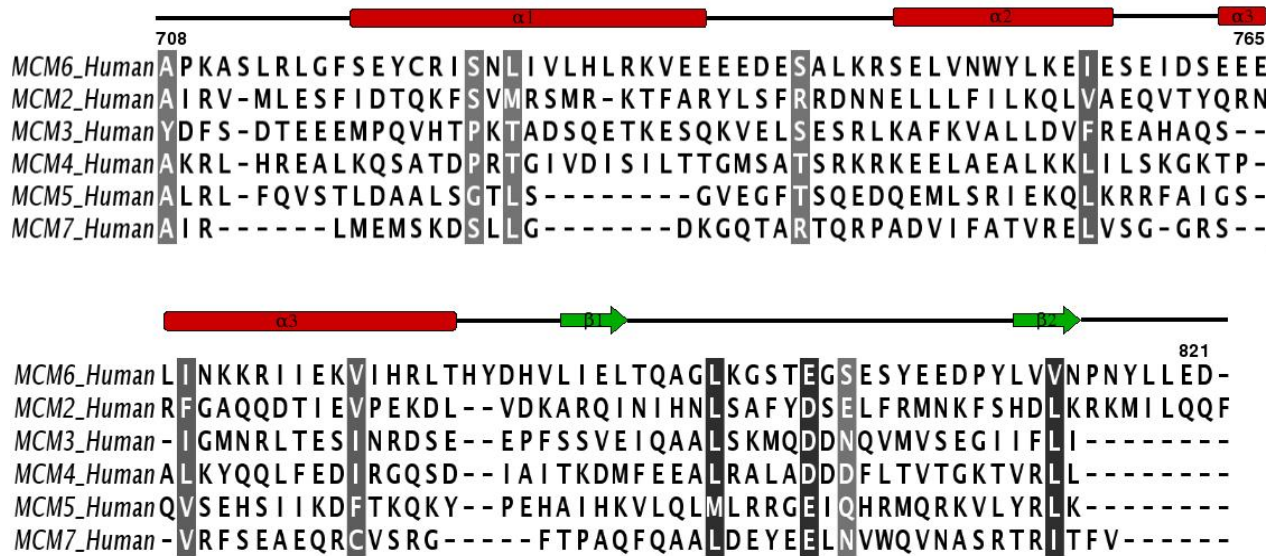

**Table S1** Statistics of the NMR structure of hMBD

---

|                                                                   |                   |                          |
|-------------------------------------------------------------------|-------------------|--------------------------|
| <i>NMR restraints</i>                                             |                   |                          |
| <i>Total Experimental Restraints</i>                              |                   | <i>146</i>               |
| <i>Total NOE Distance Restraints</i>                              |                   | <i>90</i>                |
| <i>Short-range,  i-j ≤1</i>                                       |                   | <i>68</i>                |
| <i>Medium-range, 1&lt; i-j &lt;5</i>                              |                   | <i>22</i>                |
| <i>Dihedral restraints</i>                                        |                   | <i>56</i>                |
| <i>Statistics for structures</i>                                  |                   |                          |
| <i>Final Energies (kcal/mol)</i>                                  |                   |                          |
| <i>van der Waals</i>                                              | <i>(kcal/mol)</i> | <i>-81.4419 ± 9.4536</i> |
| <i>NOE</i>                                                        | <i>(kcal/mol)</i> | <i>0.01700 ± 0.0075</i>  |
| <i>Violations</i>                                                 |                   |                          |
| <i>Number of NOE violations &gt; 0.5Å</i>                         |                   | <i>0 ± 0</i>             |
| <i>R.m.s. deviation (Å) from experimental distance restraints</i> |                   | <i>0.0134 ± 0.0032</i>   |
| <i>Number of dihedral angle constraint violations &gt; 5°</i>     |                   | <i>0 ± 0</i>             |
| <i>R.m.s. deviation (°) from experimental torsion restraints</i>  |                   | <i>0.1196 ± 0.1145</i>   |
| <i>Deviations from idealized geometry</i>                         |                   |                          |
| <i>Bonds (Å)</i>                                                  |                   | <i>0.00880 ± 0.0004</i>  |
| <i>Angles (°)</i>                                                 |                   | <i>1.05800 ± 0.0450</i>  |
| <i>Improper (°)</i>                                               |                   | <i>1.33720 ± 0.1408</i>  |
| <i>Structural RMSD to the mean coordinate</i>                     |                   |                          |
| <i>region (residue number)</i>                                    |                   | <i>bb/heavy (Å)</i>      |
| <i>411-440</i>                                                    |                   | <i>4.337/5.341</i>       |
| <i>421-432</i>                                                    |                   | <i>0.479 / 1.348</i>     |
| <i>Ramachandran plot (% residues)</i>                             |                   |                          |
| <i>Residues in most favored regions</i>                           |                   | <i>77.6%</i>             |
| <i>Residues in additional allowed regions</i>                     |                   | <i>20.0%</i>             |
| <i>Residues in generously allowed regions</i>                     |                   | <i>2.40%</i>             |
| <i>Residues in disallowed regions</i>                             |                   | <i>0.00%</i>             |

---
